# Supplementary material for: Lineage-specific duplication of amphioxus retinoic acid degrading enzymes (CYP26) resulted in sub-functionalization of patterning and homeostatic roles
Source: PubMed Central journal article supplement (PMC5247814; doi:10.1186/s12862-016-0863-1), 2017-01-19
Supplement: 12862_2016_863_MOESM2_ESM.pdf [file 12862_2016_863_MOESM2_ESM.pdf]

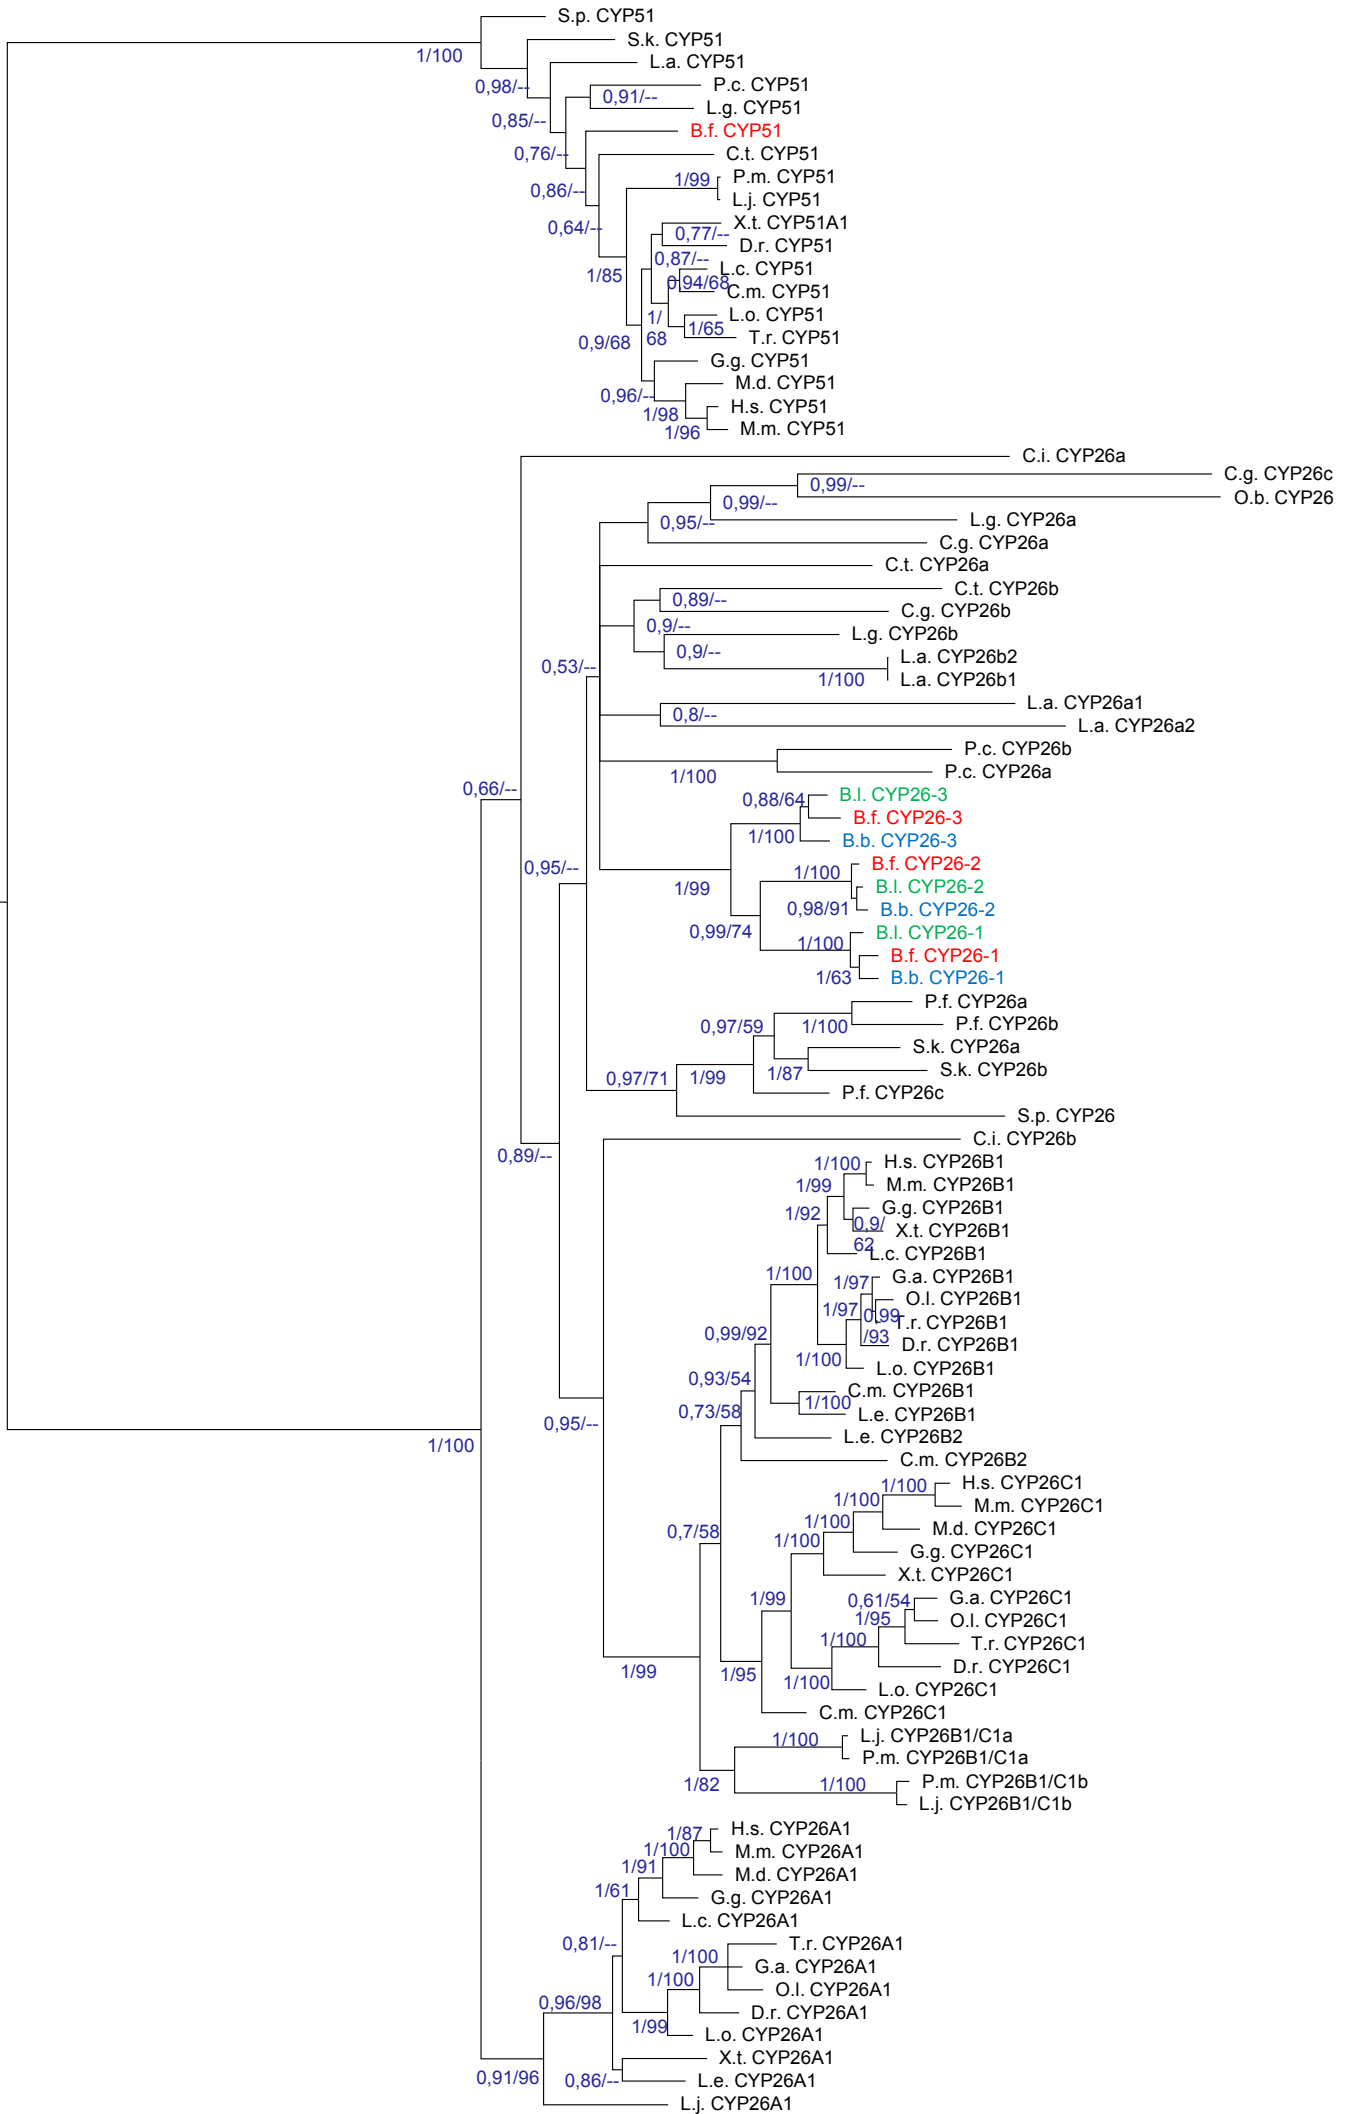

0.5
