# Supplementary material for: Lineage-specific duplication of amphioxus retinoic acid degrading enzymes (CYP26) resulted in sub-functionalization of patterning and homeostatic roles
Source: BMC Evol Biol. 2017 Jan 19;17:24. doi: 10.1186/s12862-016-0863-1 (PMC5247814; doi:10.1186/s12862-016-0863-1)
Supplement: Additional file 1: — Accession numbers of the CYP26 and CYP51 subfamily sequences used to calculate the phylogenetic trees and to carry out the dating analyses. Species names and database information are provided for each sequence. (XLSX 12 kb) [file 12862_2016_863_MOESM1_ESM.xlsx]

## Sheet: Additional file 1
Species name	CYP26			CYP51	Database information
Octopus bimaculoides	Ocbimv22014306m				Ensembl Metazoa
Strongylocentrotus purpuratus	SPU_020876-tr			NM_001001906	Ensembl Metazoa + NCBI
	CYP26a	CYP26b
Capitella teleta	CapteT212322	CapteT150007		CapteT173561	Ensembl Metazoa
Ciona intestinalis	ENSCING00000004832	ENSCING00000004829			Ensembl
Lingula anatina	g12897 (1) & g3653 (2)	g32063 (1) & g9815 (2)		g19581	http://marinegenomics.oist.jp/lingula/viewer/info?project_id=47
Lottia gigantea	LotgiT189041	LotgiT111029		LotgiT108695	Ensembl Metazoa
Priapulus caudatus	XM_014805928	XM_014806206		XM_014805882	NCBI
Saccoglossus kowalevskii	NM_001168052	XM_002734838		XM_002741540	NCBI
	CYP26a	CYP26b	CYP26c
Crassostrea gigas	EKC33614	XM_011438536	EKC37998		Ensembl Metazoa + NCBI
Ptychodera flava	pfl_40v0_9_20150316_1g13469	pfl_40v0_9_20150316_1g3888-1g3889	pfl_40v0_9_20150316_1g33013-1g3891		http://marinegenomics.oist.jp/acornworm/viewer/info?project_id=33
	CYP26-1	CYP26-2	CYP26-3
Branchiostoma belcheri	200590F	200570F	200560F		http://mosas.sysu.edu.cn/genome/ B.belcheri_v18h27.r3_ref_cds
Branchiostoma floridae	87629	87630	124944	115377	JGI
Branchiostoma lanceolatum	KX118106	KX118108	KX118107		NCBI
	CYP26A1	CYP26B1	CYP26C1
Callorhinchus milii		SINCAMT00000006531 (1) & SINCAMT00000015587 (2)	SINCAMT00000020684	SINCAMT00000007547	Ensembl
Danio rerio	ENSDART00000041728	ENSDART00000110347	ENSDART00000077809	ENSDART00000062551	Ensembl
Gallus gallus	ENSGALT00000010885	ENSGALT00000025943	ENSGALT00000010892	NM_001048077	Ensembl + NCBI
Gasterosteus aculeatus	ENSGACT00000020316	ENSGACT00000024919	ENSGACT00000014688		Ensembl
Homo sapiens	ENST00000224356	ENST00000001146	ENST00000285949	ENST00000003100	Ensembl
Latimeria chalumnae	ENSLACT00000018096	ENSLACT00000017367		XM_014495166	Ensembl + NCBI
Lepisosteus oculatus	ENSLOCT00000008440	ENSLOCT00000001423	ENSLOCT00000008459	XM_006636012	Ensembl + NCBI
Lethenteron japonicum	JL2346	JL2347 (a) & JL2570 (b)		JL5543	http://jlampreygenome.imcb.a-star.edu.sg/
Leucoraja erinacea	ctg91131	ctg64746 (1) & ctg97427-91018-26897 (2)			http://skatebase.org/
Monodelphis domestica	ENSMODT00000008033		XM_007478797	XM_001378153	Ensembl + NCBI
Mus musculus	ENSMUST00000025946	ENSMUST00000077705	ENSMUST00000073391	ENSMUST00000001507	Ensembl
Oryzias latipes	ENSORLT00000018195	ENSORLT00000004309	ENSORLT00000002542		Ensembl
Petromyzon marinus		ENSPMAT00000005233 (a) & ENSPMAT00000000847 (b)		ENSPMAT00000008420	Ensembl
Takifugu rubripes	ENSTRUT00000004636	ENSTRUT00000032048	ENSTRUT00000032509	XM_003969360	Ensembl + NCBI
Xenopus tropicalis	ENSXETT00000039436	ENSXETT00000046568	ENSXETT00000039433	ENSXETT00000007437	Ensembl
